# Supplementary material for: α-Catenin homodimers are recruited to phosphoinositide-activated membranes to promote adhesion
Source: PubMed Central journal article supplement — J Cell Biol. 2017 Nov 6;216(11):3767–83. doi: 10.1083/jcb.201612006 (PMC5674881; doi:10.1083/jcb.201612006), 2017-11-06
Supplement: JCB_201612006_sm.pdf [file JCB_201612006_sm.pdf]

Wood et al., <https://doi.org/10.1083/jcb.201612006>.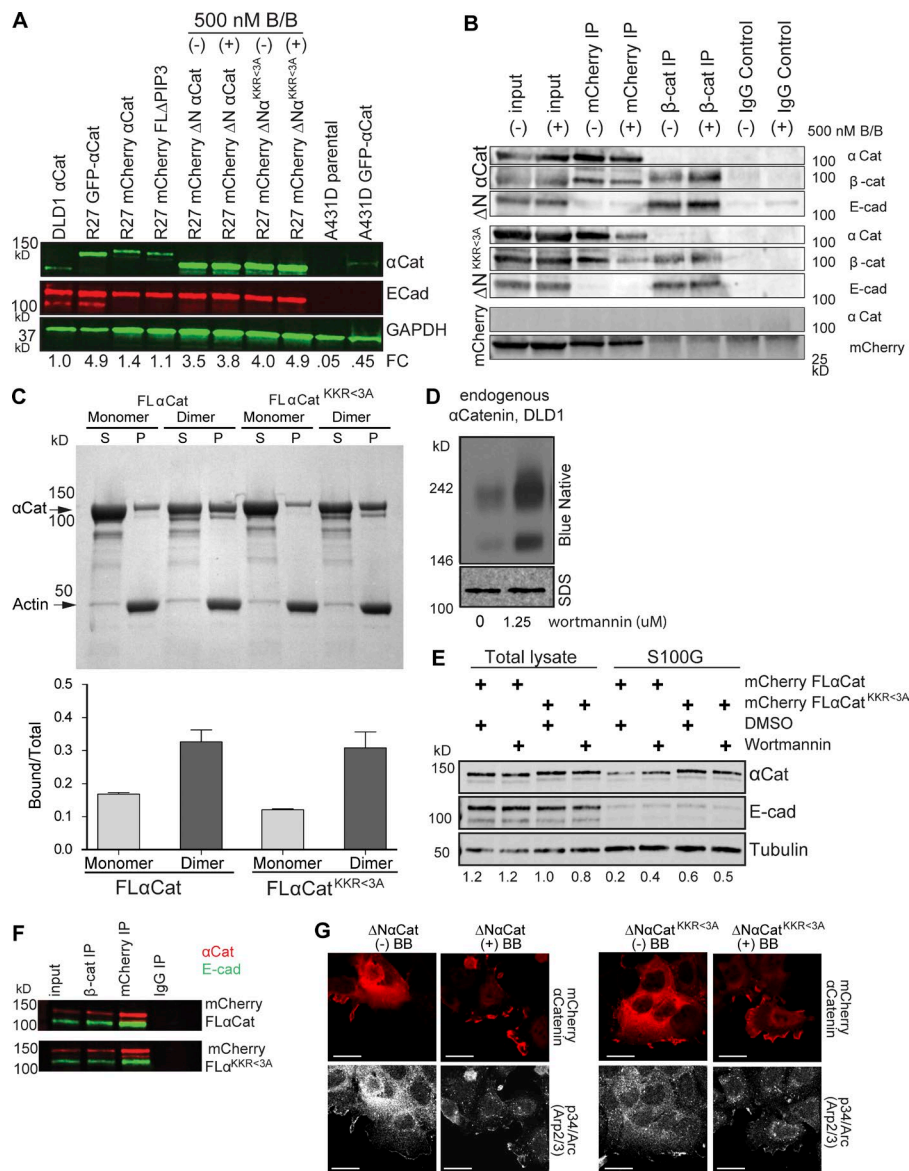

**Figure S1. Cell line characterization and controls.** (A) Immunoblot (LiCOR) analysis of all cell lines and constructs used in this study.  $\alpha$ Cat band intensities were normalized to GAPDH and expressed as a fold change (FC) of endogenous  $\alpha$ Cat in DLD1 cells. Note that fluorescently tagged FL $\alpha$ Cat and FL $\alpha$ Cat<sup>KKR-3A</sup> proteins are expressed similarly to endogenous  $\alpha$ Cat.  $\Delta$ N $\alpha$ Cat and  $\Delta$ N $\alpha$ Cat<sup>KKR-3A</sup> mutant proteins are overexpressed threefold compared with endogenous but, importantly, are similarly expressed to each other. (B) Immunoprecipitation of  $\Delta$ N $\alpha$ Cat and  $\Delta$ N $\alpha$ Cat<sup>KKR-3A</sup> cells (treated with [+] or without [-] the B/B homodimerizer) with antibodies to either mCherry or  $\beta$ -catenin and immunoblotted for E-cadherin to show that N-terminal  $\Delta$ N $\alpha$ Cat truncation prevents association with the cadherin–catenin complex. Although  $\beta$ -catenin coimmunoprecipitates with the  $\Delta$ N $\alpha$ Cat construct, concordant association with E-cadherin is lost, confirming that  $\alpha$ Cat incorporation within the cadherin–catenin complex is blocked. Because the inverse immunoprecipitation of  $\beta$ -catenin does not also pull down  $\alpha$ Cat, we reason that  $\Delta$ N $\alpha$ Cat coimmunoprecipitation is more efficient and likely binds  $\beta$ -catenin indirectly, perhaps via APC (Choi et al., 2013). (C) Monomeric and dimeric forms of FL $\alpha$ Cat and FL $\alpha$ Cat<sup>KKR-3A</sup> show similar actin binding activities. The actin-pelleting assay was performed with 5  $\mu$ M of actin and 5  $\mu$ M of  $\alpha$ Cat. Bottom: the actin-bound fraction of  $\alpha$ Cat was determined for each reaction by densitometry analysis of SDS-PAGE gels stained with Coomassie blue. Bar graph reflects mean of three independent assays with SD. WT versus mutant  $\alpha$ Cat homodimers show no significantly different binding to F-actin by *t* test. (D) PI3K signaling decreases solubility of  $\alpha$ Cat pool. BN-PAGE (top) analysis of a cytosolic fraction of endogenous  $\alpha$ Cat isolated by detergent-free, freeze-thaw lysis (see Materials and methods) from DLD1 cells (parent to the R2/7  $\alpha$ Cat negative line). SDS gel (bottom) analysis of a total, Triton X-100–soluble fraction of  $\alpha$ Cat as a control. (E) Detergent-free lysis and cytosolic fractionation (S100G) of R2/7 FL $\alpha$ Cat and FL $\alpha$ Cat<sup>KKR-3A</sup> cells treated either with DMSO or 5  $\mu$ M wortmannin. Quantification of  $\alpha$ Cat densitometry ratioed to tubulin blots below. (F) Immunoprecipitation of FL $\alpha$ Cat and FL $\alpha$ Cat<sup>KKR-3A</sup> constructs and blot back for components of the cadherin–catenin–complex. (G) Migrating cells in wound front ( $\Delta$ N $\alpha$ Cat/ $\Delta$ N $\alpha$ Cat<sup>KKR-3A</sup> in R2/7 cells) were costained for Arp2/3 to look for potential changes in colocalization. Bar, 20  $\mu$ m. Although previous studies suggest  $\alpha$ Cat homodimerization inhibits Arp2/3 activity (Drees et al., 2005; Benjamin et al., 2010), and the slower wound closure of FL $\alpha$ Cat relative to FL $\alpha$ Cat<sup>KKR-3A</sup> cells in Fig. 7 support this concept, we find no obvious evidence of  $\alpha$ Cat competition of Arp3 from the leading edge.

Video 1.  **$\alpha$ Cat forced dimerization promotes cortical recruitment and filopodia formation.** Part 1: live imaging of mCherry-iDimerize Empty-Vector (EV) and mCherry-iDimerize- $\Delta$ N $\alpha$ Cat-expressing R2/7 DLD1 cells treated with (+) or without (-) bidentate (B/B "dimerizer") and monodentate washout (W/O) ligand in 6-h time course. Note that labels and time stamps are incorporated within corresponding image frames. mCherry-iDimerize- $\Delta$ N $\alpha$ Cat is rapidly recruited to the periphery after addition of B/B ligand (within 10 s; red arrows). The mCherry-iDimerize EV (control construct) localizes to the nucleus and cytoplasm, where addition of the B/B ligand promotes nuclear exclusion rather than cortical recruitment. Part 2: live imaging of mCherry-iDimerize-WT- $\Delta$ N $\alpha$ Cat- and  $\Delta$ N $\alpha$ Cat<sup>KKR<3A</sup> mutant-expressing cells (red) coinfecting with GFP-LifeAct (green). Shown first: mCherry-iDimerize-WT- $\Delta$ N $\alpha$ Cat before (left) and after (right) B/B treatment (40-s time course). Note formation of elongated filopodia within 10 s after B/B treatment. Shown second: mCherry-iDimerize- $\Delta$ N $\alpha$ Cat<sup>KKR<3A</sup> mutant-expressing cell before (left) and after (right) B/B treatment (60-s time course). Note no formation of elongated filopodia after B/B treatment.

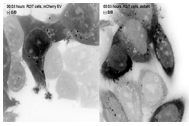

Video 2.  **$\alpha$ Cat forced dimerization promotes protrusion-dependent cell-cell contact.** Split-screen video of mCherry-iDimerize-WT- $\Delta$ N $\alpha$ Cat-expressing (left) and  $\Delta$ N $\alpha$ Cat<sup>KKR<3A</sup> mutant-expressing (right) cell couplets (red) coinfecting with GFP-LifeAct (green). Labels and time stamps are incorporated within corresponding image frames. Note that addition of the B/B-dimerizer allows WT  $\Delta$ N $\alpha$ Cat-expressing couplets to close a gap between the two cells (yellow arrows) and remain in close proximity; this gap reappears upon addition of the wash-out (W/O) ligand. This activity is less prominent in an  $\Delta$ N $\alpha$ Cat<sup>KKR<3A</sup> mutant couplet.

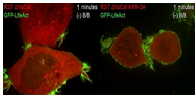

Video 3. **EGF promotes  $\alpha$ Cat cortical recruitment independently of the cadherin-catenin complex.** Live imaging of GFP-full-length- $\alpha$ Cat-expressing A431D cells (cadherin-catenin negative) and stimulation with EGF (CN02; Cytoskeleton). Labels and time stamps are incorporated within corresponding image frames. Note that GFP- $\alpha$ Cat is rapidly recruited to the cortex upon EGF stimulation (within 1 s), with concomitant decrease in cytoplasmic staining, and subsequent appearance of filopodia (within 5 s, red arrows).

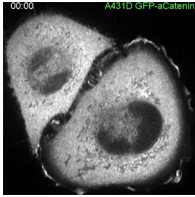

Video 4.  **$\alpha$ Cat basic patch contributes to epithelial cohesion and migration.** Live imaging of part 1: mCherry-full-length- $\alpha$ Cat-restored R2/7 cells imaged for 12 h postwounding at 20x; WT, full-length  $\alpha$ Cat (FL $\alpha$ Cat; shown first) and charge mutant  $\alpha$ Cat (FL $\alpha$ Cat<sup>KKR<3A</sup>; shown second) are compared. Images taken every 10 s during time course. Red arrows indicate  $\alpha$ Cat enrichments to the lamellipodial edge, which were quantified in Fig. 7 B. Part 2: Live imaging at 40x of mCherry-full-length- $\alpha$ Cat and mutant  $\alpha$ Cat<sup>KKR<3A</sup>-expressing cells (red) coinfecting with GFP-LifeAct (green). Labels and time stamps are incorporated within corresponding image frames. Note colocalization of  $\alpha$ Cat with LifeAct (yellow arrowheads) and formation of radial protrusions (white arrows) during epithelial sheet wound closure.

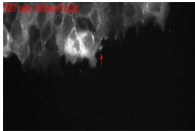

## References

- Benjamin, J.M., A.V. Kwiatkowski, C. Yang, F. Korobova, S. Pokutta, T. Svitkina, W.I. Weis, and W.J. Nelson. 2010.  $\alpha$ E-catenin regulates actin dynamics independently of cadherin-mediated cell-cell adhesion. *J. Cell Biol.* 189:339–352. <http://dx.doi.org/10.1083/jcb.200910041>
- Choi, S.H., C. Estarás, J.J. Moresco, J.R. Yates III, and K.A. Jones. 2013.  $\alpha$ -Catenin interacts with APC to regulate  $\beta$ -catenin proteolysis and transcriptional repression of Wnt target genes. *Genes Dev.* 27:2473–2488. <http://dx.doi.org/10.1101/gad.229062.113>
- Drees, F., S. Pokutta, S. Yamada, W.J. Nelson, and W.I. Weis. 2005.  $\alpha$ -catenin is a molecular switch that binds E-cadherin- $\beta$ -catenin and regulates actin-filament assembly. *Cell.* 123:903–915. <http://dx.doi.org/10.1016/j.cell.2005.09.021>
